# Supplementary material
Source: Springer Nature journal article supplement (https://www.springermedizin.de/resource/supplementary/12931_2011_1197_MOESM1_ESM.pdf/9425720)

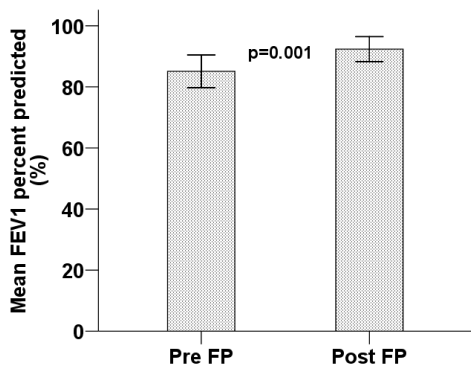

(a)

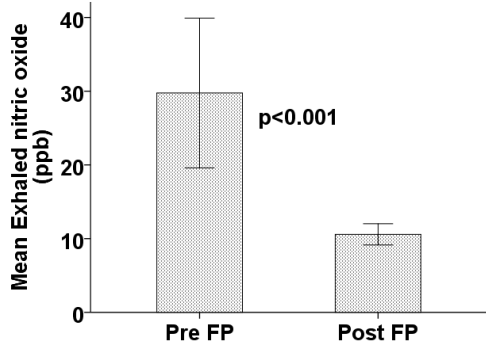

(b)

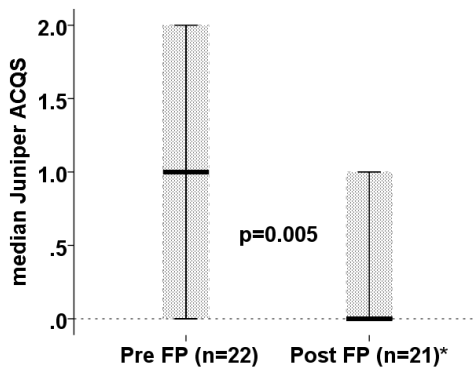

(c)

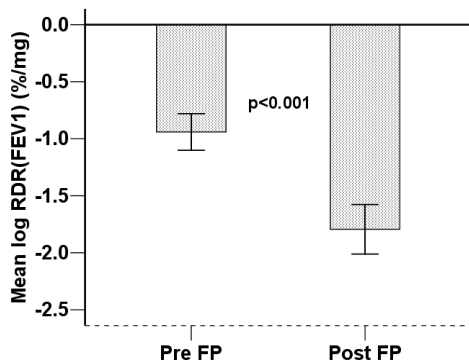

(d)

Supplement: MOESM1 [file 9425720]
